# Supplementary material for: Prevention Strategies for Sexual Harassment in Academic Medicine: A Qualitative Study
Source: PubMed Central journal article supplement — J Interpers Violence. 2020 Jan 30;37(5-6):NP2490–515. doi: 10.1177/0886260520903130 (PMC8921881; doi:10.1177/0886260520903130), 2020-01-30
Supplement: sj-pdf-4-jiv-10.1177_0886260520903130.pdf [file sj-pdf-4-jiv-10.1177_0886260520903130.pdf]

## Appendix 2

### Qualitative content analysis - summary of the categories

Step 2 - The results of the subcategories (reduction 2) of doctors and nurses are arranged in this step in the following structure (sequence).

- The subcategories are compared and further reduced in order to avoid duplication within the subcategories.
- Review, revision and further reduction (2-3) as well as summaries of the subcategory system, which will then show the cross occupational group subcategories reduction 3.
- Reduction 3 is formed of the final subcategories.

| Categories                   | Result of reduction 2_ Nurses                                                                                                                                           | Result of reduction 2_ Doctors                                                                                                                                                                                                 | Generalization                                                                                                                     | Subcategories Reduction 3           |
|------------------------------|-------------------------------------------------------------------------------------------------------------------------------------------------------------------------|--------------------------------------------------------------------------------------------------------------------------------------------------------------------------------------------------------------------------------|------------------------------------------------------------------------------------------------------------------------------------|-------------------------------------|
| <b>UC Protection</b>         |                                                                                                                                                                         |                                                                                                                                                                                                                                |                                                                                                                                    |                                     |
| Institutionalized Protection | SC_N 1.1.<br>Institutionalized points of contact and offers for protection within the company<br><br>SC_N 1.2.<br>Institutionalized training and anti-violence programs | SC_D 1.1.<br>Institutional protection through programs and trainings<br><br>SC_D 1.2.<br>Contact persons in the gender violence program<br><br>SC_D 1.3.<br>Central representatives as contact persons inside the organization | Institutionalized protection<br>- Training<br>- Gender violence awareness program<br>- Central representatives/ counselling center | SC<br>Structural protection measure |

|                                         |                                                                                                                                                                                                                           |                                                                                                                                                   |                                                                                                                               |                                                                                           |
|-----------------------------------------|---------------------------------------------------------------------------------------------------------------------------------------------------------------------------------------------------------------------------|---------------------------------------------------------------------------------------------------------------------------------------------------|-------------------------------------------------------------------------------------------------------------------------------|-------------------------------------------------------------------------------------------|
| Protective measures from superiors      | <p>SC_N 2.1.<br/>Supervisors as trusted third parties must recognize sexual harassment, intervene and take measures.</p> <p>SC_N 2.2.<br/>Supervisors should be aware of the measures for aftercare</p>                   | <p>SC_D 2.1.<br/>Trust and protection by (female) superiors</p>                                                                                   | <p>- Trust and protection by superiors</p>                                                                                    | <p>SC<br/>Protection Superiors</p>                                                        |
| Protective measures in the team         | <p>SC_N 3.1.<br/>Communication in the team offers relief and protection</p> <p>SC_N 5.2.<br/>Relief and maintenance of mental health</p>                                                                                  | <p>SC_D 3.1.<br/>Individual agreements on protective measures in teams</p> <p>SC_D 4.1.<br/>Existing consulting formats e.g. Team Supervision</p> | <p>- Alliances with colleagues and agreements on de-escalating measures</p> <p>- Individual strategies for mental Health</p>  | <p>SC<br/>Protection Team</p>                                                             |
| Protective measures in patient settings | <p>SC_N 4.1<br/>Protection against sexual harassment through team agreements</p> <p>SC_N 4.2.<br/>Protection in patient setting</p> <p>SC_N 4.3.<br/>Clear, inter-professional agreements to reduce sexual harassment</p> | <p>SC_D 4.1.<br/>Relief through communication with colleagues.</p>                                                                                | <p>- Alliances with colleagues and agreements on de-escalating measures</p> <p>- Consulting formats e.g. Team Supervision</p> | <p>SC<br/>Protection strategies in the patient setting</p>                                |
| Individual Protection                   | <p>SC_N 5.1.<br/>Techniques for Individual Protection</p> <p><i>-see previous category-</i></p>                                                                                                                           | <p>SC_D 5.1.<br/>Learned techniques and experiences are applied in patient settings.</p>                                                          | <p><i>-see previous category-</i></p>                                                                                         | <p>SC<br/>Protection strategies in patient setting<br/><i>-see previous category-</i></p> |

|                                                  |                                                                                                                                                                                                                                                                                                                    |                                                                                                                                                                                                                                                                                                       |                                                                                                                                                                                                                                       |                                                     |
|--------------------------------------------------|--------------------------------------------------------------------------------------------------------------------------------------------------------------------------------------------------------------------------------------------------------------------------------------------------------------------|-------------------------------------------------------------------------------------------------------------------------------------------------------------------------------------------------------------------------------------------------------------------------------------------------------|---------------------------------------------------------------------------------------------------------------------------------------------------------------------------------------------------------------------------------------|-----------------------------------------------------|
|                                                  |                                                                                                                                                                                                                                                                                                                    | SC_D 5.2.<br>Highlighting the dominance and status of medicine and setting limits                                                                                                                                                                                                                     |                                                                                                                                                                                                                                       |                                                     |
| Protection on horizontal level                   |                                                                                                                                                                                                                                                                                                                    | SC_D 6.1.<br>Individual self-protection measures at horizontal level<br><br>SC_D 6.2.<br>External gender-specific-awareness trainings                                                                                                                                                                 | Individual handling of sexual harassment on a horizontal level                                                                                                                                                                        | SC<br>Self-protection strategies against colleagues |
| <b>UC Prevention</b>                             |                                                                                                                                                                                                                                                                                                                    |                                                                                                                                                                                                                                                                                                       |                                                                                                                                                                                                                                       |                                                     |
| Prevention strategies<br>Clinic management board | SC_N 1.1.<br>Strategies of Prevention through removal of taboos and change in values<br><br>SC_N 1.2.<br>Equal treatment and appreciation of all professions in the clinic<br><br>SC_N 1.3.<br>Jobs that rely on safety, quality and protection<br><br>SC_N 1.4.<br>Duty of care and protection through house bans | SC_D 1.1.<br>Clear and visible positioning of clinic management removes taboos on sexual harassment<br><br>SC_D 1.2.<br>Prevention through non-discriminatory culture and a change in values<br><br>SC_D 1.3.<br>Institutionalized formal regulations for protection and prevention must be drawn up. | - Clear and visible positioning of the clinic management creates removal of taboos<br><br>- Low-discrimination culture and a change in values as strategic prevention<br><br>- Procedures for a respectful and fair corporate culture | SC<br>Strategy clinic management Board              |

|                      |                                                                                                                                                                                                                                                                                                          |                                                                                                                                                                                                                                                                                                                                                                  |                                                                                                                                                                                                                                                                                                                                                |                                                                                        |
|----------------------|----------------------------------------------------------------------------------------------------------------------------------------------------------------------------------------------------------------------------------------------------------------------------------------------------------|------------------------------------------------------------------------------------------------------------------------------------------------------------------------------------------------------------------------------------------------------------------------------------------------------------------------------------------------------------------|------------------------------------------------------------------------------------------------------------------------------------------------------------------------------------------------------------------------------------------------------------------------------------------------------------------------------------------------|----------------------------------------------------------------------------------------|
|                      |                                                                                                                                                                                                                                                                                                          | <p>SC_D 1.4.<br/>Public announcement of regulation and procedures</p> <p>SC_D 2.1.<br/>Management strategies for gender parity and diversity in management positions</p> <p>SC_D 2.2.<br/>Special prevention strategies to reconcile family and career</p>                                                                                                       | <p>- Prevention through formal regulations and standardized procedures</p> <p>- Strategic concept on gender parity and diversity</p> <p>- Reconciling work and family</p>                                                                                                                                                                      | <p>SC<br/>Gender parity and reconciling work and family life as corporate strategy</p> |
| Organizational level | <p>SC_N2.1.<br/>Implementation of the given change in values through senior managers</p> <p>SC_N2.2.<br/>Ongoing information on sexual harassment and taboo issues. Contact person in the department</p> <p>SC_N2.3.<br/>Flat hierarchies as prevention against sexual harassment and discrimination</p> | <p>SC_D 3.1.<br/>Implementation of a zero tolerance policy of the clinic management</p> <p>SC_D 3.2.<br/>Managers create a change in values through an established culture of correctness</p> <p>SC_D 3.3.<br/>Managers are familiar with regulations and intervention measures</p> <p>SC_D 3.4.<br/>A leadership style based on democracy and participation</p> | <p>- Supervisors/ Managers implement the strategic guidelines in the departments</p> <p>- Managers are aware of regulations and procedures for the intervention process</p> <p>- Establishing a team culture that emphasizes the fundamental value of employees</p> <p>- Leadership style with employee participation and flat hierarchies</p> | <p>SC<br/>Leadership culture</p>                                                       |

|                 |                                                                                                                                                                                                                                                             |                                                                                                                                                                                                                                                                                                                         |                                                                                                                                                                                  |                                          |
|-----------------|-------------------------------------------------------------------------------------------------------------------------------------------------------------------------------------------------------------------------------------------------------------|-------------------------------------------------------------------------------------------------------------------------------------------------------------------------------------------------------------------------------------------------------------------------------------------------------------------------|----------------------------------------------------------------------------------------------------------------------------------------------------------------------------------|------------------------------------------|
|                 |                                                                                                                                                                                                                                                             | <p>can reduce sexual harassment/discrimination</p> <p>SC_D 5.1.<br/>Flat hierarchies and a leadership style geared to democratic and participatory components</p> <p>SC_D 6.3.<br/>Difficult social issues/taboo topics delegated in each department<br/>Space and time for social communicative topics in meetings</p> | <p>Regular information on the topic and a delegated person for taboo topics and social-communicative competence</p>                                                              |                                          |
| Structure level | <p>SC_N 3.1.<br/>Trainings on social and communicative competence permanently and continuously offered</p> <p>SC_N 3.2.<br/>Training to raise awareness of cultural diversity and its needs</p> <p>SC_N 3.3.<br/>Offering continuous consulting formats</p> | <p>SC_D 4.1.<br/>Training courses on sexual harassment and social communicative competence for all employees</p> <p>SC_D 4.2.<br/>Compulsory training for managers on sexual harassment</p>                                                                                                                             | <p>- Compulsory further training courses for managers</p> <p>- Further training on the topic and fair play for all employees</p> <p>- Offers of different consulting formats</p> | SC<br>Personnel development<br>Trainings |
| Structure Level | <p>SC_N 5.1.<br/>Central representatives for consulting and support</p>                                                                                                                                                                                     | <p>SC_D 6.1.<br/>Low-threshold and anonymous reporting</p>                                                                                                                                                                                                                                                              | <p>- Anonymous reporting systems</p>                                                                                                                                             | SC<br>Structure Level                    |

|                      |                                                         |                                                                                                                                                              |                                                                       |                                                  |
|----------------------|---------------------------------------------------------|--------------------------------------------------------------------------------------------------------------------------------------------------------------|-----------------------------------------------------------------------|--------------------------------------------------|
|                      | SC_N 5.2.<br>Anonymous, low-threshold reporting systems | systems (Whistleblower software)<br><br>SC_D 7.1.<br>Contact points/complaint offices can use public relations work to protect and prevent sexual harassment | - Central representatives for consulting and supporting the procedure |                                                  |
| Organizational level | SC_N 4.<br>Process-optimization                         | SC_D 4.<br>Process-optimization                                                                                                                              | - Participation in unit change processes – process optimization       | SC<br>Participation in unit Process-optimization |
| Organizational level | SC_N 6.<br>Safety systems and structural measures       |                                                                                                                                                              |                                                                       | SC<br>Safety systems and structural measures     |
